# Supplementary material for: Eliminating common biases in modelling the electrical conductivity of carbon nanotube–polymer nanocomposites
Source: Royal Society of Chemistry journal article supplement (doi:10.1039/c8cp01715h), 2018-01-01
Supplement: c8cp01715h1.pdf [file c8cp01715h1.pdf]

Electronic Supplementary Material (ESI) for PCCP.  
This Journal is © The Royal Society of Chemistry 2018

## Eliminating Common Biases in Modelling Electrical Conductivity of Carbon Nanotubes-Polymer Nanocomposites

Linh Trong Hoang,<sup>a</sup> Siu Ning Leung<sup>\*b</sup> and Zheng Hong Zhu<sup>b</sup>

<sup>a</sup>Department of Mechanical Engineering, York University, Toronto, ON, Canada M3J 1P3

<sup>b</sup>Department of Physics and Astronomy, York University, Toronto, ON, Canada M3J 1P3

\*Corresponding author: sunny.leung@lassonde.yorku.ca

### I. Typical Model Used to Represent Carbon Nanotube Network in a Polymer Matrix

Fig. S1 illustrates the periodic pattern of carbon nanotube (CNT) network represented in typical simulation models reported in open literature. If a CNT protrudes out of a representative volume element (RVE) from a boundary surface, the outside portion will be cut and moved to the opposite boundary surface pointing into the RVE. The crossing paths AA' and BB' (highlighted lines) could be conductive but this conductive path will not be included in the conductive network when a single RVE is considered.

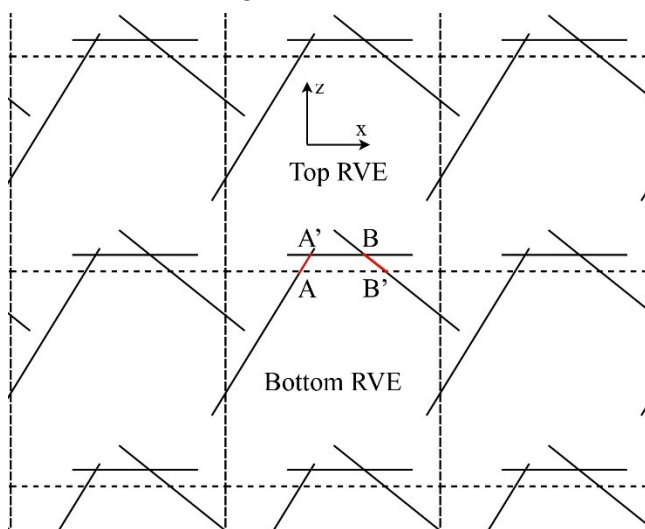

Figure S1 Visual representation of periodic pattern of carbon nanotubes network
